# Supplementary material for: Comparison of 2 Natural Language Processing Methods for Identification of Bleeding Among Critically Ill Patients
Source: PubMed Central journal article supplement (PMC6324448; doi:10.1001/jamanetworkopen.2018.3451), 2018-10-12
Supplement: jamanetwopen-1-e183451-s001.pdf [file jamanetwopen-1-e183451-s001.pdf]

## Supplementary Online Content

Taggart M, Chapman WW, Steinberg BA, et al. Comparison of 2 natural language processing methods for identification of bleeding among critically ill patients. *JAMA Netw Open*. 2018;1(6):e183451. doi:10.1001/jamanetworkopen.2018.3451

**eTable 1.** Features Selection for Machine Learning: n-grams Associated and Not Associated With Clinically Relevant Bleeding

**eTable 2.** Target Terms Used in Natural Language Processing Task to Identify Bleeding From Clinical Notes

**eTable 3.** Modifier Terms Used in Natural Language Processing Task to Identify Bleeding From Clinical Notes

**eTable 4.** Average Computational Time for Each Natural Language Processing Approach

**eTable 5.** “Bleeding Present” Phrases Identified by the Rules-Based Algorithm, but Not Identified by the Physician Reviewer

This supplementary material has been provided by the authors to give readers additional information about their work.

**eTable 1. Features selection for machine learning: n-grams associated and not associated with clinically relevant bleeding<sup>a</sup>**

| Features associated with “bleeding absent”                                                                                                                                                                                                                                                                                                                                                                  | Features associated with “bleeding present”                                                                                                                                                                                                                                  |
|-------------------------------------------------------------------------------------------------------------------------------------------------------------------------------------------------------------------------------------------------------------------------------------------------------------------------------------------------------------------------------------------------------------|------------------------------------------------------------------------------------------------------------------------------------------------------------------------------------------------------------------------------------------------------------------------------|
| labetolol mg<br>syringe<br>mmhg cardiac output<br>hypertrophic<br>change make medications<br>start spironolactone<br>history significant diabetes<br>significant diabetes<br>pna patient<br>drainage incision<br>day omeprazole<br>initial chest<br>position seat<br>room follow<br>sputum culture grow<br>small bilateral<br>spiriva inh<br>chest tube placement<br>blood base intuba<br>lastname continue | bleed<br>gi<br>gi bleed<br>egd<br>gib<br>hematoma<br>gastrointestinal bleed<br>hemorrhage<br>subdural<br>bleed gib<br>gi bleed gib<br>ffp<br>bleed gi bleed<br>gastrointestinal bleed gi<br>bleed gi<br>units units units<br>octreotide<br>prbcs<br>hematuria<br>units units |
| <sup>a</sup> Feature selection was performed using chi-squared tests. The chi-square value was zero for all features associated with “bleeding absent.” Chi-square values range from 1.626 to 9.062 for features associated with “bleeding present”                                                                                                                                                         |                                                                                                                                                                                                                                                                              |

**eTable 2. Target terms used in natural language processing task to identify bleeding from clinical notes.**

| Clinical Concept | Regular Expression                                                 |
|------------------|--------------------------------------------------------------------|
| bleed            | (?<!non)(?<!non )(?<!non-)(?<!re)(bleed(?!ing) bleeding(?!\stime)) |
| blood loss       | blood loss                                                         |
| blood per rectum | blood per rectum                                                   |
| bloody           | (?<!non-)(?<!non)(?<!non )bloody                                   |
| brbpr            | brbpr                                                              |
| coffee grounds   | coffee[- ](ground grounds)                                         |
| ecchymosis       | ecchymos[ie]s                                                      |
| epistaxis        | epistaxis                                                          |
| exsanguination   | exsanguination                                                     |
| gib              | \b!gib\b                                                           |
| guaiac           | ((\bg gua?iac)([-])\s+)((pos(itive)?)\ +)\ guaiac\(\+\))           |
| hematemesis      | hematem[a-z]+                                                      |
| hematochezia     | hematochezia                                                       |
| hematoma         | hematoma                                                           |
| hematuria        | hematuria                                                          |
| hemoperitoneum   | hemoperitoneum                                                     |
| hemoptysis       | hemoptysis                                                         |
| hemorrhage       | (?<!splinter\s)hem{1,2}or{1,2}h{1,2}age?                           |
| ich              | \bich                                                              |
| melena           | mel[ae]n(alic)                                                     |
| ng lavage post   | (ng ngt)\s+lavage\s+((positive) \ )\ +                             |
| ng lavage pre    | ((positive) \ )\ + (ng ngt) lavage                                 |
| occult blood     | (fecal\s+occult(\s+blood)?\ bob \bfob)\s+pos(itive)?               |
| sah              | sah                                                                |
| sdh              | sdh                                                                |
| stool            | (maroon red)\s+(stool bowel\s+movement bm)                         |
| vomitting        | vomit[a-z]* blood                                                  |

**eTable 3. Modifier terms used in natural language processing task to identify bleeding from clinical notes. A minus-sign (-) in the Rule column indicates that the modifier marked its associated target term as bleeding-absent. A plus-sign (+) indicates that the modifier confirmed its target term as bleeding-present.**

| Clinical Concept | Regular Expression                         | Rule |
|------------------|--------------------------------------------|------|
| ago              | \bago\b                                    | -    |
| can result in    | \bcan\s+result\s+in\b                      | -    |
| cc               | (cc: chief complaint:)                     | +    |
| ddx              | ddx                                        | -    |
| deny             | denies denied denying                      | -    |
| did not show     | did not (show reveal)                      | -    |
| episode          | episode of                                 | +    |
| episodes         | episodes of                                | +    |
| found to have    | found to have                              | +    |
| here with        | here (with w\\ w/)                         | +    |
| history          | ((h/o) (h\\o) (hx ?of) history \bhx\b pmh) | -    |
| history of       | history\s+of                               | -    |
| if               | \bif\b                                     | -    |
| in the past      | \bin\s+the\s+past\b                        | -    |
| monitor          | monitor( for)?                             | -    |
| negative         | \bnegative\b                               | -    |
| negative dash    | \(-)                                       | -    |
| never            | \bnever\b                                  | -    |
| no               | \bno\b                                     | -    |
| no evidence      | no (evidence e\\o e/o)                     | -    |
| no history       | no ((h/o) (h\\o)) hx)                      | -    |
| non              | non(\s -)                                  | -    |
| not              | not\b                                      | -    |
| now with         | now (with w\\ w/)                          | +    |
| possible         | possible                                   | -    |
| presenting       | presenting* (with w\\ w/)                  | +    |
| presents         | present[s e][d]* (with w\\ w/)             | +    |
| previous         | previous                                   | -    |
| prior            | \bprior\b                                  | -    |
| risk             | risk of                                    | -    |
| rule out         | (rule out rVo)                             | -    |
| recent admission | recent\s+admission                         | -    |
| suspicion        | suspicion                                  | -    |
| transfuse        | transfuse                                  | -    |
| unlikely         | unlikely                                   | -    |
| unrevealing      | unrevealing\s+for                          | -    |
| versus           | versus vs                                  | -    |
| watch            | watch for                                  | -    |
| without          | ((without) (w\\o) (w/o))(?!scontrast)      | -    |

**eTable 4. Average computational time<sup>a</sup> for each natural language processing approach.**

| <b>Model</b> | <b>Notes per Second</b> |
|--------------|-------------------------|
| SVM          | 42.72                   |
| ET           | 5818.42                 |
| CNN          | 122.16                  |
| RB           | 3.09                    |

<sup>a</sup>Computational time if calculated as the number of notes each model is able to process per second, as an average over the 660-note test set. These tests were run on a machine with a 4-core intel i7 CPU and 16 gigabytes of RAM.

SVM=support vector machine; ET=extra trees classifier; CNN=convolutional neural network; RB=rule-based model

**eTable 5. “Bleeding present” phrases identified by the rules-based algorithm, but not identified by the physician reviewer**

|                                                               |
|---------------------------------------------------------------|
| left upper extremity hematoma                                 |
| with signs/symptoms of bleeding                               |
| loose melena                                                  |
| L second toe with hemtoma present                             |
| likely hemorrhage related to                                  |
| bleed noted at cath site                                      |
| coffee-ground emesis                                          |
| guaiac + stools                                               |
| Small hematoma                                                |
| re-op for chest wall hematoma                                 |
| diffuse ecchymoses, INR > 22.8                                |
| guaic + stools                                                |
| persistent area of bleeding                                   |
| bloody exudate                                                |
| R groin with ecchymosis                                       |
| Anemia, acute, secondary to blood loss (Hemorrhage, Bleeding) |
| stools were guaiac positive                                   |
| excess amounts of postoperative bleeding                      |
| left parietal subgaleal hematoma present                      |
| line site bleeding                                            |
| subdural hematoma on L                                        |
| consistent with alveolar hemorrhage                           |
